# Supplementary material for: Nitrogen and fluorine co-doped graphene as a high-performance anode material for lithium-ion batteries
Source: Royal Society of Chemistry journal article supplement (doi:10.1039/c5ta06012e), 2015-01-01
Supplement: c5ta06012e1.pdf [file c5ta06012e1.pdf]

## **Supporting Information**

### **Nitrogen and Fluorine Co-Doped Graphene as High-Performance**

#### **Anode Material for Lithium-Ion Batteries**

*Shizheng Huang, Yu Li, Yiyu Feng, Haoran An, Peng Long, Chengqun Qin and Wei Feng\**

School of Materials Science and Engineering, Tianjin University and Tianjin Key Laboratory of Composite and Functional Materials, Tianjin 300072, P. R. China

#### **Corresponding Author**

\*E-mail: weifeng@tju.edu.cn, fengyiyu@tju.edu.cn Tel:+86-22-87402059. Fax: +86-22-27404724.

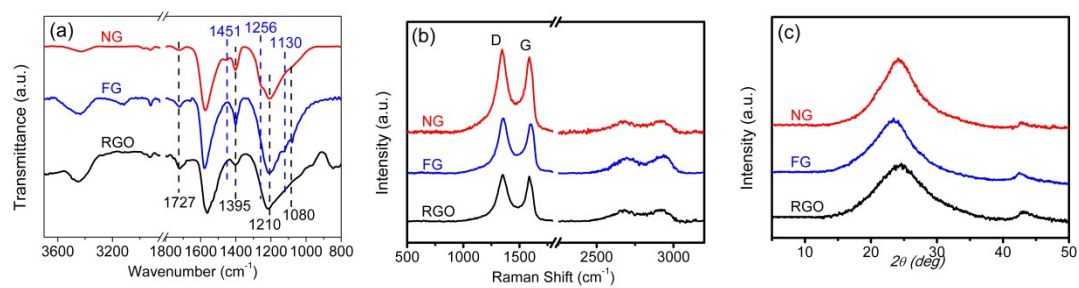

**Fig. S1** (a) FT-IR spectrum, (b) Raman spectrum, and (c) XRD patterns of NG and RGO.

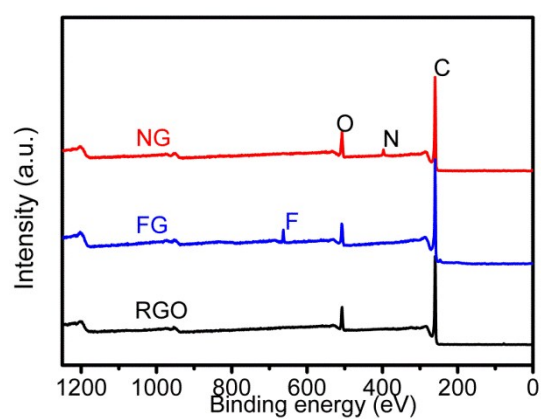

**Fig. S2** XPS survey spectra of the NG and RGO.

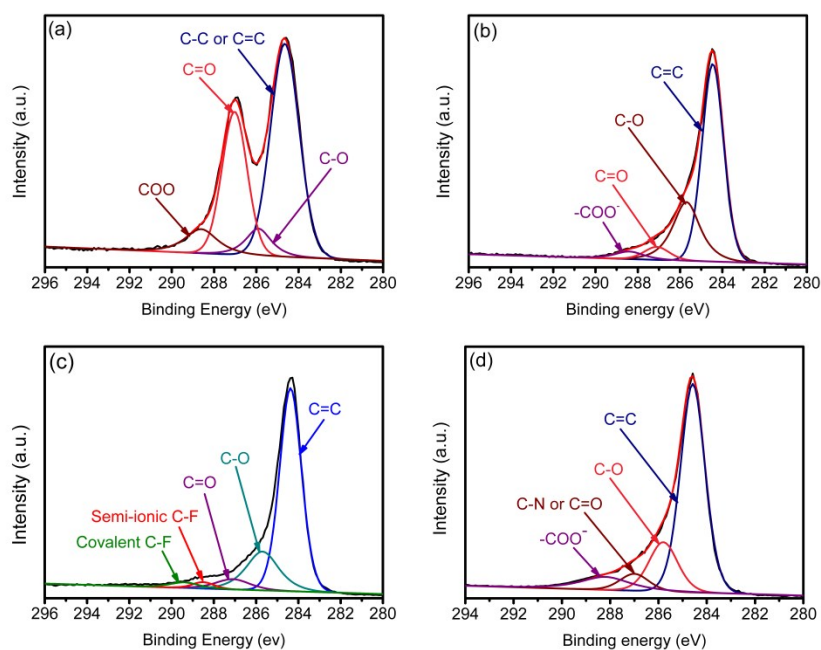

**Fig. S3** High resolution C1s spectrum of GO (a), RGO (b), FG (c) and NG (d).

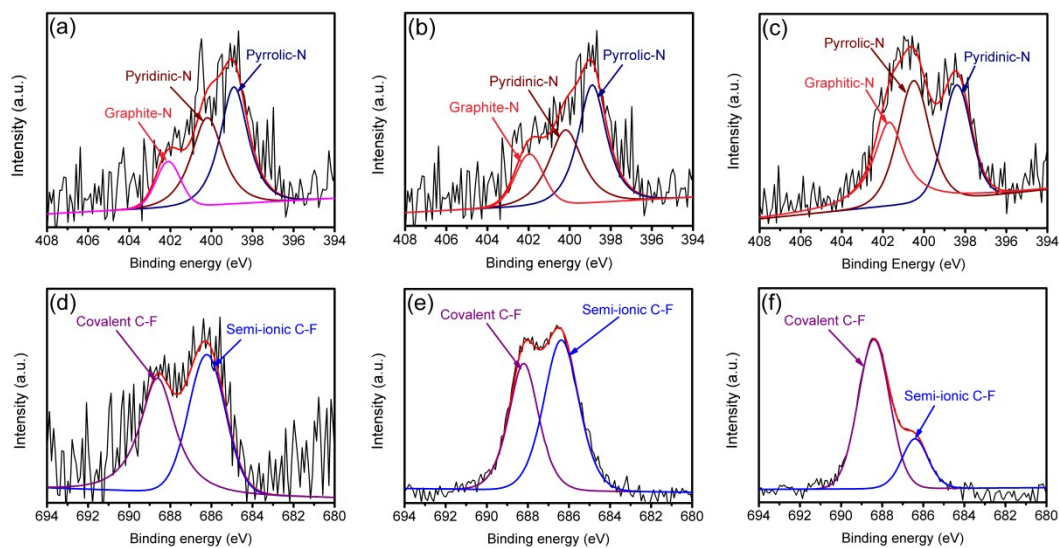

**Fig. S4** High-resolution N1s spectrum FNG-90 (a), FNG-120 (b) and FNG-180 (c); High-resolution F1s spectrum of FNG-90 (d), FNG-120 (e) and FNG-180 (f).

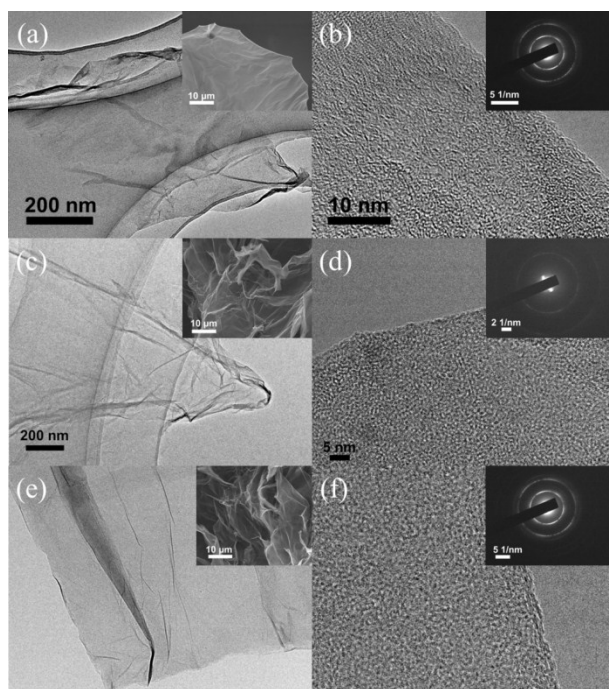

**Fig. S5** (a) TEM image of RGO. Inset: SEM image of RGO. (b) HR-TEM of RGO. Inset: Corresponding SAED pattern of RGO. (c) TEM image of FG. Inset: SEM image of FG. (d) HR-TEM of FG. Inset: Corresponding SAED pattern of FG. (e) TEM image of NG. Inset: SEM image of NG. (f) HR-TEM of NG. Inset: Corresponding SAED pattern of NG.

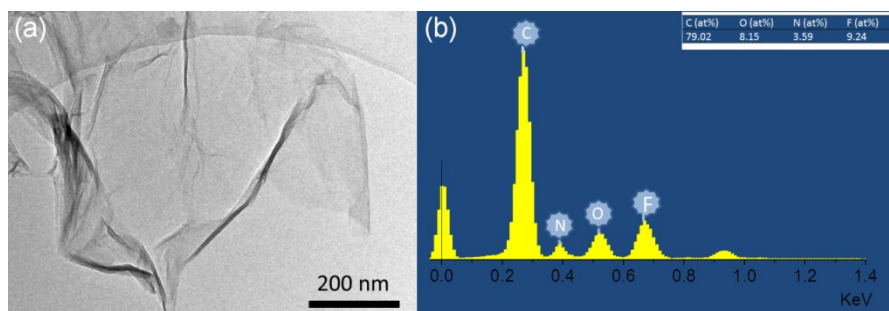

**Fig. S6** TEM image of NFG-150(a), EDX spectra of NFG-150.

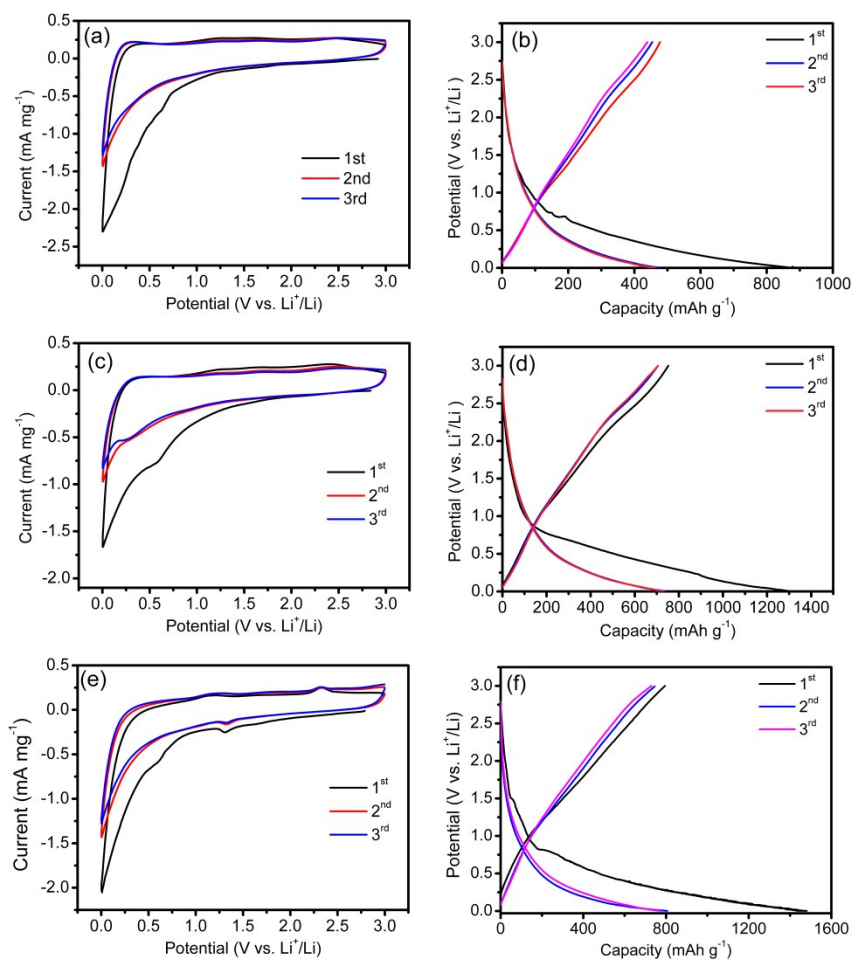

**Fig. S7** The first three CV curves (a) and The first three discharge–charge profiles (b) of RGO. The first three CV curves (c) and The first three discharge–charge profiles(d) of NG.

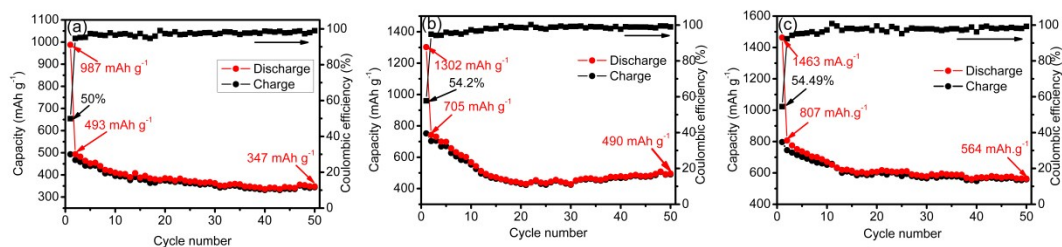

**Fig. S8** Cycle performance of RGO (a), FG (b) and NG (c) as anode materials at a current density of  $100 \text{ mA g}^{-1}$ .

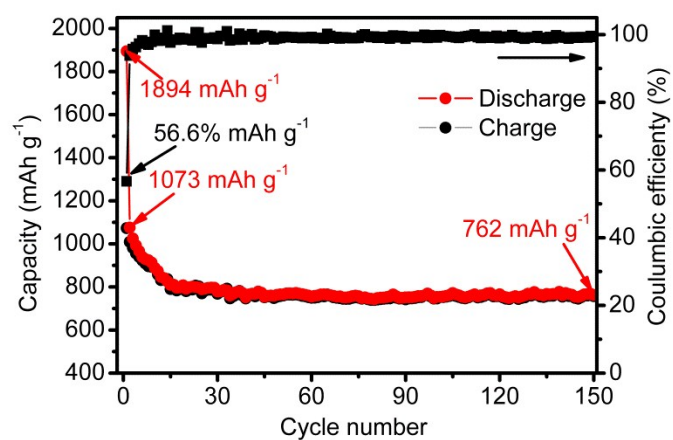

**Fig. S9** cycling and Coulombic efficiency NFG-150 at a current density of 100 mA g<sup>-1</sup>

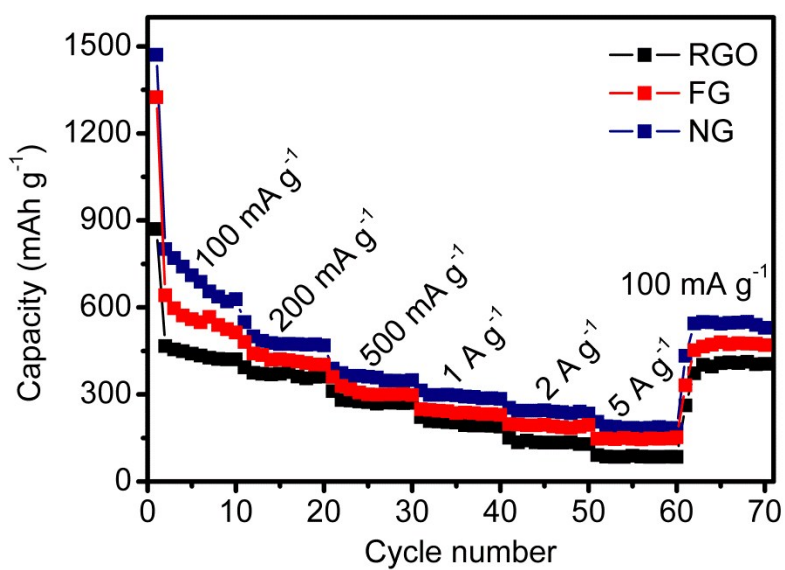

**Fig. S10** Rate capability of RGO, FG and NG at current densities of 100, 200, 500, 1000, 2000, 5000, and 100 mA g<sup>-1</sup>.

## References

[S1] Safety Information of Hydrofluoric Acid.

[http://www.sigmaaldrich.com/catalog/ProductDetail.do?lang=en&N4=30107|SIAL&N5=SEARCH\\_CONCAT\\_PNO|](http://www.sigmaaldrich.com/catalog/ProductDetail.do?lang=en&N4=30107|SIAL&N5=SEARCH_CONCAT_PNO|)

[BRAND\\_KEY&F=SPEC](#)
